# Supplementary material for: Fast retrieval of XCO 2 over East Asia based on the OCO-2 spectral measurements
Source: Copernicus journal article supplement (doi:10.5194/amt-2023-224), 2023-11-20
Supplement: Supplementary file [file amt-2023-224-AC1-supplement.pdf]

## Reviewer-1

The authors propose a machine learning based retrieval of XCO<sub>2</sub> for an OCO-2 like sensor using a neural network. The overall research direction is important for our field and a promising avenue to deal with the ever-higher data rates of future space borne instruments for trace gas retrievals. However, the study present requires major revisions to be considered for AMT. Most importantly I am concerned that the model might get the right result for the wrong reasons and uses some of the parameters like solar zenith and azimuth angle to estimate the location of a given OCO-2 observation, rather than using the information contained in the measured spectrum. In essence, the model might simply interpolate XCO<sub>2</sub> spatially and temporally instead of retrieving it from the observations.

Thank you for your valuable comments here and below. We have addressed all concerns by refining the methodology. Our approach aims to contribute to the field by providing an efficient retrieval solution for future space-borne instruments. We believe these revisions make our manuscript suitable for publication in AMT. We sincerely appreciate your help in improving our paper.

General Comments:

[1] Please make explicit what the innovation of this work is compared to state of the art.

A major innovation is using accurate radiative transfer simulations to generate the training data, rather than relying solely on experimental data products. This simulation-based training approach could help overcome limitations in existing experimental data.

Additionally, our neural network model achieves XCO<sub>2</sub> retrieval speeds orders of magnitude faster than traditional methods, reducing computation time from multiple seconds to less than 1 millisecond. This dramatic improvement in retrieval efficiency could enable real-time processing of the massive data volumes expected from next-generation greenhouse gas monitoring satellites.

Importantly, our model achieves a precision of around 2 ppm, competitive with the current state-of-the-art in retrieval accuracy. We also demonstrate the ability to accurately capture temporal variations and trends in XCO<sub>2</sub> by validating against reliable TCCON ground-based data. This level of verifiable performance is an important capability.

These have been made explicitly in the updated manuscript.

[2] I am concerned that the model might get the right solution for the wrong reason and uses some of the parameters like solar zenith and azimuth angle to estimate the location. Please probe for that. E.g. remove spectral information and repeat your model training. How much does your RMSE increase? Remove spatial information (sun-satellite geometry) and repeat your experiment. Use XAI methods to look at feature importance, etc.

Thank you for your valuable suggestions. In response to your concerns, we utilized widely recognized eXplainable Artificial Intelligence (XAI) methods, specifically SHAP (SHapley Additive exPlanations) and LIME (Local Interpretable Model-Agnostic Explanations), to analyze the input elements of our MLP-XCO<sub>2</sub> model:

- SHAP Analysis: We categorized input nodes into groups such as WCO<sub>2</sub>, SCO<sub>2</sub>, various geographical parameters, vapor profile, and temperature profile. Fig. 1 shows the detailed view of feature contributions across these categories.

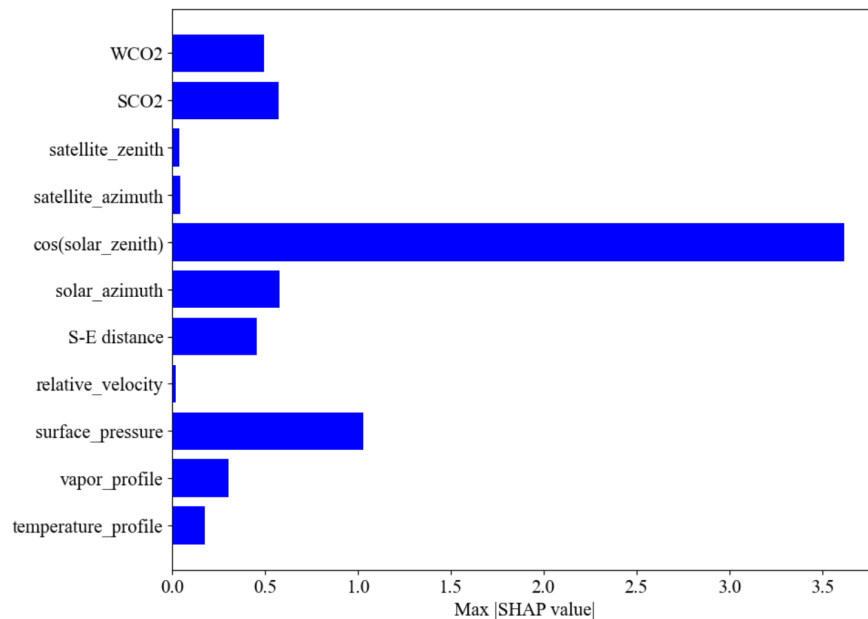

Figure 1: SHAP analysis illustrating the impact of feature categories on the MLP-XCO<sub>2</sub> model

- LIME Analysis: Complementing global insights from SHAP, LIME allowed us

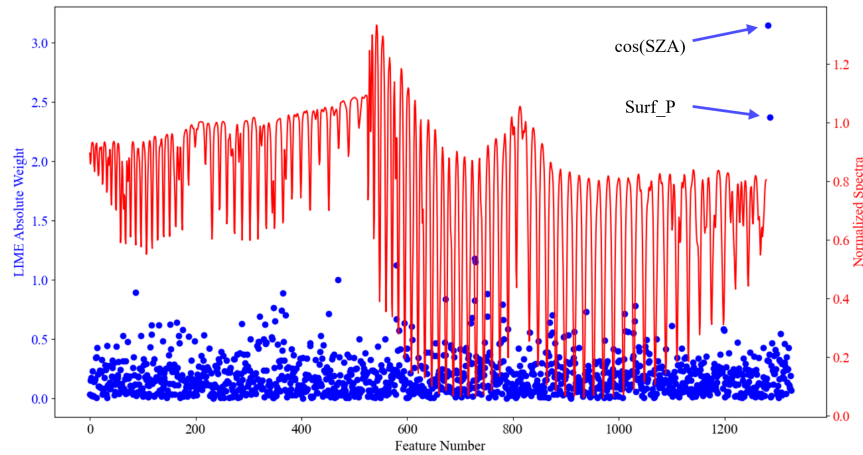

Figure 2: LIME feature weights for the MLP-XCO<sub>2</sub> model

to explore specific contributions of individual input sources on a localized scale (Fig. 2)

While surface pressure and solar zenith consistently contributed most to model predictions, our analysis also highlighted the significant impact of WCO<sub>2</sub> and SCO<sub>2</sub> spectral data. Notably, spectral features aligned with CO<sub>2</sub> absorption peaks played a critical role in accurate XCO<sub>2</sub> prediction.

We refined the model by focusing on contributory non-prior data (solar zenith and azimuth) and excluding less impactful features like relative velocity and the Sun-Earth distance. The revised model now includes the angular information, the spectral information, surface pressure, and the corresponding year.

However, the surface pressure, a critical parameter, is not directly available and is typically retrieved based on the O<sub>2</sub>-A band. Therefore, in our updated manuscript, we first retrieve the surface pressure from the L2MET file using another compact machine learning model, referred to as MLP-P, before inputting it into the MLP-XCO<sub>2</sub> model. The MLP-P model, trained on historical OCO-2 product data, provides stable future predictions of surface pressure. We have revised the manuscript to include a detailed description of the MLP-P model.

We added the corresponding year as one of the input parameters because an overlooked aspect in our initial manuscript is the gradual degradation and the need for

adjustments in the OCO-2 instrument response parameters over time. These parameters include the instrument line shape function, bad pixel list, and spectral dispersion coefficients. While these parameters may remain consistent over short periods, they exhibit significant variations over the years, which can affect the long-term reliability of the model.

Therefore, in our updated manuscript, the network has four key components as input: spectral information, angular information, the MLP-P predicted surface pressure, and the corresponding year (e.g., 2016 or 2017, etc.).

Another suggestion you made was to “remove spectral information and repeat your model training.” Following this advice, we conducted experiments with a model trained solely on non-spectral information. As depicted in Fig 3, the results generally aligned with the XCO<sub>2</sub> range but failed to provide accurate predictions within the same year.

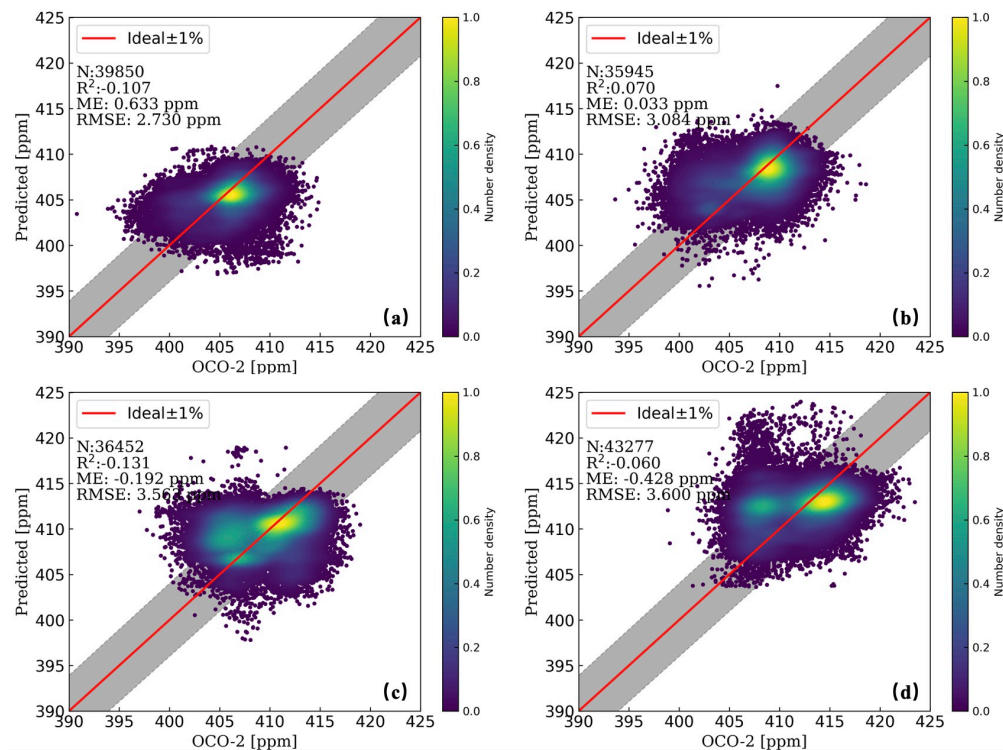

Figure 3: Comparison of XCO<sub>2</sub> results predicted by the MLP-XCO<sub>2</sub> model using solely non-spectral data inputs, with results retrieved from the OCO-2 v10r product spanning from 2017 to 2020. Panels (a) through (d) display the MLP-XCO<sub>2</sub> model predictions for the years 2017 to 2020, respectively

Many samples under identical angular and yearly conditions remained indistinguishable. However, when spectral data were reintroduced to the input layer, as shown in Fig. 11 of the updated manuscript, the MLP-XCO<sub>2</sub> model exhibited a significant performance improvement. Spectral information effectively addressed the inaccuracies in XCO<sub>2</sub> retrievals under identical observational conditions. Furthermore, the revised manuscript includes enhanced testing focused on plume detection, as presented in Figs. 12 and 13. These additions provide substantial evidence of the MLP-XCO<sub>2</sub> model's ability to extract critical information from spectral data for future predictions, going beyond simple interpolation of XCO<sub>2</sub> predictions using non-spectral input parameters.

- [3] How would we get an uncertainty estimate from your approach? How do you know when your model fails.

Thank you for raising this important point. Estimating uncertainty is important for ensuring the reliability of machine learning models for satellite-based XCO<sub>2</sub> retrieval. While our current MLP-XCO<sub>2</sub> model does not provide direct uncertainty estimates, we recognize this as an area for future improvement.

A number of techniques exist for quantifying uncertainty in deep neural networks [1,2]. However, generating robust uncertainty estimates requires a substantial volume of matched input and target data. The ideal dataset would contain numerous examples of OCO-2 observations paired with corresponding TCCON XCO<sub>2</sub> measurements across diverse conditions. This would enable sampling to assess the variance in our model's predictions across the full distribution. Unfortunately, the limited availability of matched OCO-2 and TCCON data, especially for TCCON sites in "nadir" mode, means the current sample size is insufficient for comprehensive uncertainty quantification in the presented study.

Our primary contribution in the current study is demonstrating that simulated training data can complement real OCO-2 data to enable stable and accurate XCO<sub>2</sub> retrieval on future observations. While we do not currently provide uncertainty bounds, estimating prediction intervals is an important next step.

These have been clarified in the updated manuscript.

- [4] What is your RMSE compared to TCCON when you apply your final model to OCO-2 data. How does that compare to the current operational retrieval of OCO-2?

The current study applies the MLP-XCO<sub>2</sub> model specifically to the “Nadir” mode observations of the OCO-2 satellite. This mode represents a temporary limitation in our validation process using the TCCON data. The “Nadir” mode focuses on the land areas directly underneath the satellite’s path (the satellite zenith is close to zero), unlike the “Target” mode that directly corresponds to the TCCON sites. Therefore, the valid TCCON samples were selected based on the OCO-2 observation time and geographic coordinates, approximating the TCCON location closely. The criteria for this selection and the data sources used are detailed in Table 3 of the original manuscript.

The updated ME and RMSE results for each year and site are presented in Fig 4 here. The RMSE values show our MLP-XCO<sub>2</sub> model has comparable, though slightly higher, errors compared to the current operational OCO-2 retrieval when validated against TCCON data. While errors are slightly higher presently, as more matched OCO-2 and TCCON data becomes available, particularly from targeted observations, we expect to improve RMSE further. Overall, these initial results demonstrate the potential of our methodology to enhance XCO<sub>2</sub> retrieval speed without sacrificing much of the accuracy.

- [5] What do you see as important future work items?

The progression of satellite-based XCO<sub>2</sub> retrieval is an important ongoing process. The current greenhouse gas monitoring satellites could provide invaluable global carbon source/sink data, but have inherent individual limitations in spatio-temporal resolution and coverage.

The current and planned satellite missions, including OCO-2/3, GOSAT/2, Tansat, and upcoming missions, signify a growing integration and collaboration of multiple satellite products. This will help address individual satellite limitations. However, it imposes greater demands on the efficiency and effectiveness of inversion algorithms.

In this context, the role of machine learning methods becomes increasingly significant,

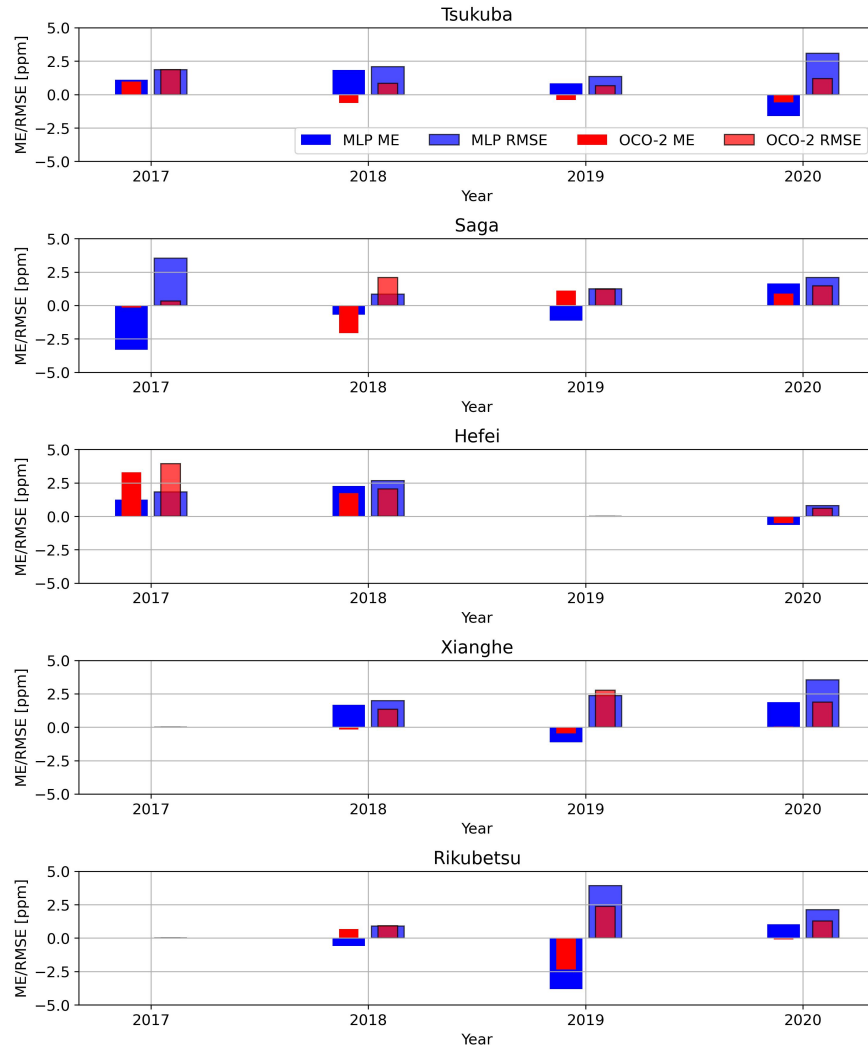

Figure 4: Comparisons of the ME and RMSE for the retrieved XCO<sub>2</sub> results from 2017 to 2020 across the five TCCON sites.

driven by their efficiency, despite current challenges in interpretability, accuracy, and feature extraction. The primary focus is on refining machine learning to meet the escalating computational demands while integrating advancements within multi-satellite analysis frameworks.

In summary, we see the future direction as progressively integrating improved machine learning methodologies into collaborative multi-satellite data analysis. This will maximize spatio-temporal capabilities and derive accurate XCO<sub>2</sub> distributions through efficient inversions.

[6] How would you resolve any step changes from two adjacent retrieval models if you would train one model for each region (as you suggested)?

Thank you for raising this question, which aligns with the issues we have contemplated for future enhancements of our current model. In addressing the potential step changes that might arise from different models for multiple regions, we propose the following strategies:

(1) The most straightforward method to mitigate step changes is to employ a single model capable of robust and smooth application over the largest possible area. However, adopting this approach poses significant challenges, including increased training costs and a greater demand for higher generalization capabilities from the network.

(2) Another strategy involves setting overlapping areas at the boundaries of different models. In regions where models converge, we suggest predesignating overlapping regions. These boundary areas would fall within the applicability range of models from both adjacent regions. As a result, XCO<sub>2</sub> values retrieved in these areas would be collectively determined based on the results from multiple models.

These strategies are designed to ensure a smoother transition between different models at regional borders, thus addressing the concerns regarding step changes in satellite remote sensing algorithms.

Specific Comments:

We sincerely thank the reviewer for the thorough and meticulous review of our manuscript.

We have categorized those specific comments into different aspects to provide clear responses.

[1] Clarity/Wording:

- Line 4: not clear what ‘retrieval efficiency’ means
- Line 4: ‘enhancing the retrieval’ could mean many things. Please be more concrete.
- Line 7: retrieval -> retrievals



- Line 8: inversion of traditional optimization models -> inversion of the operational optimization model
- Line 11: specify ‘the observed region’
- Line 13: ‘high precision’. We care about accuracy not precision. Don’t agree with 2ppm being ‘high’
- Line 38: remote sensing is not limited spatially or temporally: can’t observe at night!
- Line 39: vital for future greenhouse gas
- Line 46: ‘Enhancing satellite sensor performance alone cannot produce datasets sufficient for monitoring carbon sources and sinks’: Why?
- Line 47: Need to explain why ‘efficiency’ is important.
- Line 53: full physics model
- Line 54: atmospheric-surface -> atmospheric and surface
- Line 58: why is ‘cost function’ in quotes?
- Line 61: optimizations requires
- Line 74: ‘GOSAT instrument mode,’ : what does ‘mode’ mean here?
- Line 84: ‘In the present paper, a proof-of-concept study demonstrates a novel machine learning strategy ‘: How is this work new compared to the literature?
- Line 90: What does ‘multiple sources’ refer to?
- Figure 1: Remove: ‘The map was plotted ...’
- Figure 2: Add more info to figure description
- Line 147: ‘The other angles are provided in radians.’ Does this mean the SZA is given as the cosine? Please make explicit if that is the case.
- Line 173: this in-sample data -> these in-sample data
- Line 175: ‘depicts out-of-sample test results on 5% of the training data that was excluded from model fitting’. Training data that was not used for training is not training data.

- Line 207: Remove sentence: ‘These spectra are detected by the OCO-2 satellite detectors after downwelling absorption, surface reflection, and upwelling re-absorption in the atmosphere.’
- Line 209: you already introduced abbreviation for WCO<sub>2</sub> etc. before.
- Line 243: why is an 1% error impressive?
- Figure 5: ‘proposed’ forward calculation model: that sounds like you are proposing that model in this paper
- Line 266: ‘uncertainty’-> variability
- Line 269: repetition of text in line 262
- Figure 8: add similar plot for XCO<sub>2</sub>

We sincerely thank the reviewer again for the thorough and meticulous review of our manuscript, which has provided many valuable suggestions to help improve the clarity and wording of the paper. Based on the reviewer’s recommendations, we have carefully checked through the entire manuscript and made modifications accordingly.

[2] Methodology:

- Line 63: how much time do the two processes in the retrieval take up? Are they equally time consuming? How much time do they take up compared to any other calculations that are part of the retrieval?

The qualitative statements here only focused on explaining why the mainstream inversion algorithm is generally slow. However, we did not perform specific calculations to determine the exact time taken by the two processes in the retrieval. The time required for these processes depends on various factors and can vary. While we acknowledge the importance of understanding the specific time allocation, providing precise figures involves complexities due to numerous influencing factors. Essentially, the emphasis here is only on the qualitative assessment of the slowness of the mainstream inversion algorithm rather than quantitative time measurements.

- Line 65: ‘While rigorous, standard nonlinear optimization retrievals lack the speed and scalability required for high-precision satellite-based greenhouse gas mapping.’ That is not true. We have OCO-2, GOSAT, ...

This has been changed to “While rigorous, standard nonlinear optimization retrievals lack the speed and scalability required for high-precision real-time or near-real-time greenhouse gas mapping satellite-based greenhouse gas mapping.”

- Line 76: please expand on the work by Zhao et al (2022). What was their approach, what accuracy do they get.

In the study conducted by Zhao et al., a two-step machine learning approach was developed for retrieving atmospheric XCO<sub>2</sub> using spectral data from the GOSAT weak-CO<sub>2</sub> band. They established a direct one-dimensional line-by-line forward model to simulate GOSAT’s observed spectra within the 6180-6280 cm<sup>-1</sup> spectral interval, forming the foundation for training their machine learning model. The retrieval model operates by initially obtaining the atmospheric spectral optical thickness, followed by extracting XCO<sub>2</sub> from this optical thickness spectra. As a proof-of-concept, the method was tested in Australia under clear sky conditions using GOSAT’s spectra, demonstrating an accuracy of approximately 3 ppm for XCO<sub>2</sub> retrieval. The study also discussed potential enhancements to further refine the accuracy of this retrieval method.

- Line 96: why is the study limited to East Asia? and Line 163: Why use this subset of months?

The choice to focus on East Asia and use a subset of months in this work is primarily driven by limitations related to our hardware capabilities during both the training and testing phases. As we delved into the global spectral data observed by the OCO-2 satellite, along with its corresponding Level 2 data, we encountered significant challenges in terms of storage capacity and training memory required to process this extensive dataset. Given these hardware limitations, our strategy was to target a region where we could manage the data effectively while still achieving meaningful results. East Asia, selected as the target area for this study, became

our primary choice. This choice also allowed us to include as many TCCON sites as possible within our limited hardware setup, which was important for validating our model.

- Line 109: Could that lead to step changes at the borders of two models? If yes, how would you deal with those? What limits you to use one model for all the data? Have you tried that? If Yes, what were the results?

This issue has been addressed in our response to General Comment [6]. As mentioned there, while step changes are a common concern in machine learning models applied to different training regions, our current research has not specifically experimented with partitioned parallel modeling for the MLP-XCO<sub>2</sub>. Our focus has been on achieving satisfactory results within the East Asian region, and the suggestions for larger areas are more of a prospective outlook.

- Line 128: If you normalize each spectrum why do you need the sun-earth-distance as a feature?

Your question regarding Line 128 is indeed reasonable. After conducting additional analysis of the original MLP-XCO<sub>2</sub> network using the XAI methods, we concluded that the Sun-Earth distance feature was providing the network with insignificant information. Therefore, it has been removed from our updated model.

- Line 138: Did not understand the following sentence: ‘Although the key retrieval information for surface pressure comes from the O<sub>2</sub>-A band, machine learning models based on simulated data essentially predict XCO<sub>2</sub> by fitting the “correct solutions.”’

Sorry for any confusion. We have clarified this in the revised manuscript, explicitly addressing the utilization of surface pressure as the input feature for the machine learning model. “The surface pressure, a critical parameter, is not directly available and is typically retrieved based on the O<sub>2</sub>-A band. Therefore, in our updated manuscript, we first retrieve the surface pressure from the L2MET file using another compact machine learning model, referred to as MLP-P, before inputting it into the MLP-XCO<sub>2</sub> model. The MLP-P model, trained on historical

OCO-2 product data, provides stable future predictions of surface pressure.”

- Line 148: ‘velocity of the satellite relative to the Earth’s surface are input into the model.’: Should that number not be constant and therefore provide not information?

Regarding the question about the “relative velocity” mentioned in our manuscript, I would like to clarify that there was an inaccuracy in our description. The term was intended to refer to the velocity of the spacecraft along the Line of Sight (LOS), which is a variable quantity. This LOS velocity can lead to shifts in the wavenumber of spectral signals due to the Doppler effect. However, as addressed in our response to General Comment [2], we found that the contribution of this LOS velocity to the XCO<sub>2</sub> measurement is minimal. Consequently, in the updated version of our model, this parameter has been removed.

- Line 179: ‘This discrepancy indicates the MLP-XCO<sub>2</sub> model fails to fully capture the underlying upward trend in atmospheric CO<sub>2</sub>.’ Please run an additional experiment to confirm your hypothesis. Hold out 2018 and use 2016,2017,2019,2020 for training.

Thank you for your valuable suggestion. Following your advice, we conducted additional experiments, the results of which are now included in the updated manuscript and are specifically illustrated in Figs 4 and 5. Previously, our model, trained exclusively on data from 2016 to 2018, exhibited annual biases in the test results for 2019 and 2020. To substantiate our viewpoint, we trained a new model using OCO-2 product data from 2016, 2018, and 2020. Testing this revised model on data from 2017 and 2019 demonstrated significantly improved performance without large bias. These results provide additional evidence supporting our hypothesis regarding the model’s previous limitations in capturing the upward trend in future atmospheric CO<sub>2</sub>.

- Figure 3: Why do you show  $\pm 1\%$  and not any other value?

The choice to display the range of  $\pm 1\%$  was intended to create a visually distinct reference within the graph. There was no specific reasoning behind choosing this

particular value; instead, it was selected to provide readers with a clear and easily comprehensible point of comparison.

- Line 183: Please add more figures and analysis and show how the biases look like spatially and temporally.

This aligns with your valuable suggestion regarding Line 179. Following your advice, we conducted additional experiments, the results of which are now included in the updated manuscript and are specifically illustrated in Figs 4 and 5.

- Figure 5: How did you choose the spectra?

We ensured that each of the four examples originated from different OCO-2 files, each corresponding to distinct observation times and locations. It's important to clarify that these four examples were not specifically chosen to validate the accuracy of the forward model. Instead, they were randomly selected from the OCO-2 files we collected.

- Line 275: need more details on how the CO<sub>2</sub> profiles are generated

The generation of the vertical CO<sub>2</sub> profile is especially critical among all input parameters. This dataset theoretically determines the generalization domain of the MLP-XCO<sub>2</sub> model. In the forward model based on the ReFRACtor model, the atmospheric CO<sub>2</sub> profile is segmented into 20 sub-layers by pressure. By statistically analyzing the OCO-2 retrieved CO<sub>2</sub> profiles in the target East Asia area from 2016-2018, the box plots for atmospheric CO<sub>2</sub> concentration in each sub-layer are shown in Fig. 8. From the upper atmosphere down to the ground surface, the variability of CO<sub>2</sub> concentrations gradually increases. This challenges the ability for the standardization of atmospheric CO<sub>2</sub> profiles, particularly closer to the Earth's surface. Fortunately, a consistent year-on-year rise in CO<sub>2</sub> concentrations in each sub-layer has been observed over time. Consequently, in our research, we have proposed a method for generating subsequent CO<sub>2</sub> atmospheric profiles. We incrementally increase the CO<sub>2</sub> concentration by 2.5 ppm annually, starting from the 2016 OCO-2 retrieved CO<sub>2</sub> vertical profile. This approach ensures that we encompass a range of plausible atmospheric CO<sub>2</sub> distributions with realistic

shapes, enabling the generation of simulated spectra for the designated training years.

Based on 60,000 uniformly sampled observation data points exclusively from the OCO-2 satellite throughout 2016, we randomly separated it into six sets of 10,000 data points each. Each set represents CO<sub>2</sub> profiles from 2016 to the end of 2021, with a yearly increase of 2.5 ppm added to the original data, reflecting projected future profiles.

- Line 287: Why did you restrict yourself to 2016 data?

Our research aimed to develop a robust model for future prediction. Here is a specific scenario: assuming only the data from the year 2016 is available, Can we utilize the benefits of simulated data to train an MLP-XCO<sub>2</sub> model that not only accurately performs with the available data but also exhibits generalizability for future predictions, potentially eliminating unstable systematic biases? By restricting our dataset to a single year, we could better see how well the model learns and predicts from a limited dataset.

[3] Code/Data:

- Code availability: Please upload the code to train the model, the trained model, and the training/testing data to a public repository.

The codes and models used in this study have been uploaded to GitHub and can be accessed at: [https://github.com/TaoRen-Rad/XCO2\\_retrieval](https://github.com/TaoRen-Rad/XCO2_retrieval).

- Author contributions: FX developed the forward model: The Refractor model was already developed.

Thanks for pointing this out. It has been rephrased to “FX made updates and modifications for the Refractor forward model”

## References

- [1] B. Lakshminarayanan, A. Pritzel, C. Blundell, Simple and scalable predictive uncertainty estimation using deep ensembles, *Advances in neural information processing systems* 30.

- [2] L. V. Jospin, H. Laga, F. Boussaid, W. Buntine, M. Bennamoun, Hands-on Bayesian neural networks—A tutorial for deep learning users, *IEEE Computational Intelligence Magazine* 17 (2) (2022) 29–48.
